# Supplementary material for: A Content Analysis of Health and Safety Communications Among Internet-Based Sex Work Advertisements: Important Information for Public Health
Source: PubMed Central journal article supplement (PMC5408134; doi:10.2196/jmir.6746), 2017-04-13
Supplement: jmir_v19i4e111_app1.pdf [file jmir_v19i4e111_app1.pdf]

# Multimedia Appendix 1: Sample Screenshots

Bio Packages Gallery Availability Contact

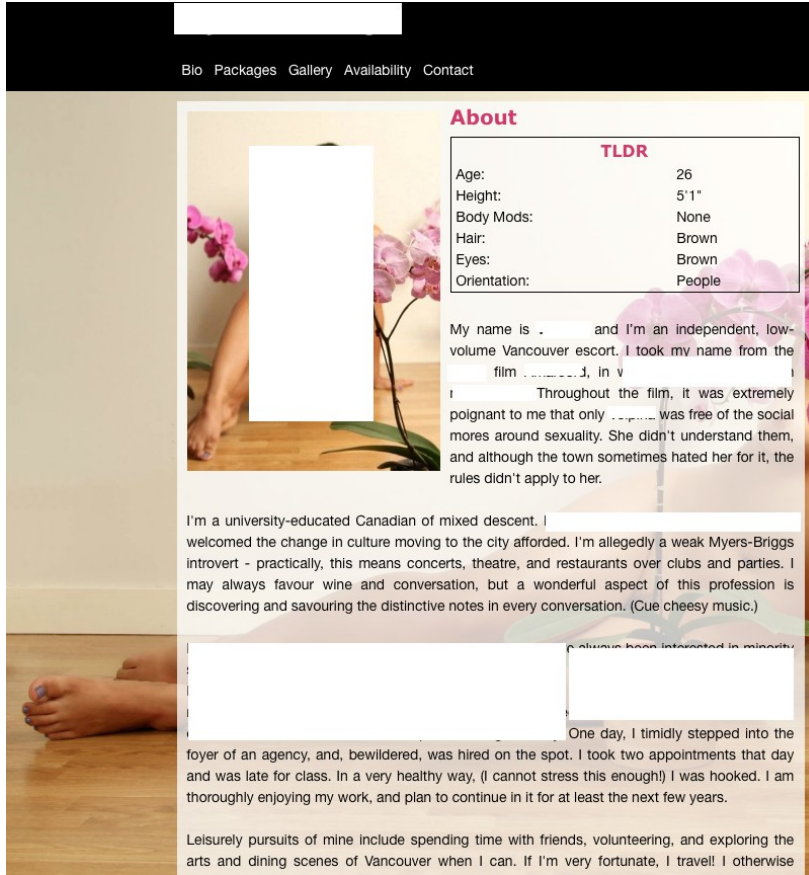

**About**

**TLDR**

Age: 26  
 Height: 5'1"  
 Body Mods: None  
 Hair: Brown  
 Eyes: Brown  
 Orientation: People

My name is [REDACTED] and I'm an independent, low-volume Vancouver escort. I took my name from the film [REDACTED], in v[REDACTED]. Throughout the film, it was extremely poignant to me that only [REDACTED] was free of the social mores around sexuality. She didn't understand them, and although the town sometimes hated her for it, the rules didn't apply to her.

I'm a university-educated Canadian of mixed descent. I [REDACTED] welcomed the change in culture moving to the city afforded. I'm allegedly a weak Myers-Briggs introvert - practically, this means concerts, theatre, and restaurants over clubs and parties. I may always favour wine and conversation, but a wonderful aspect of this profession is discovering and savouring the distinctive notes in every conversation. (Cue cheesy music.)

[REDACTED] always been interested in minority [REDACTED]

One day, I timidly stepped into the foyer of an agency, and, bewildered, was hired on the spot. I took two appointments that day and was late for class. In a very healthy way, (I cannot stress this enough!) I was hooked. I am thoroughly enjoying my work, and plan to continue in it for at least the next few years.

Leisurely pursuits of mine include spending time with friends, volunteering, and exploring the arts and dining scenes of Vancouver when I can. If I'm very fortunate, I travel! I otherwise

All Locations Search

Search Near Me Available Now Reviews Interviews Videos Photos Live Cams Login Signup

Public Photos (38) Semi-Private Photos (12) Videos (2) Map Me Contact Me

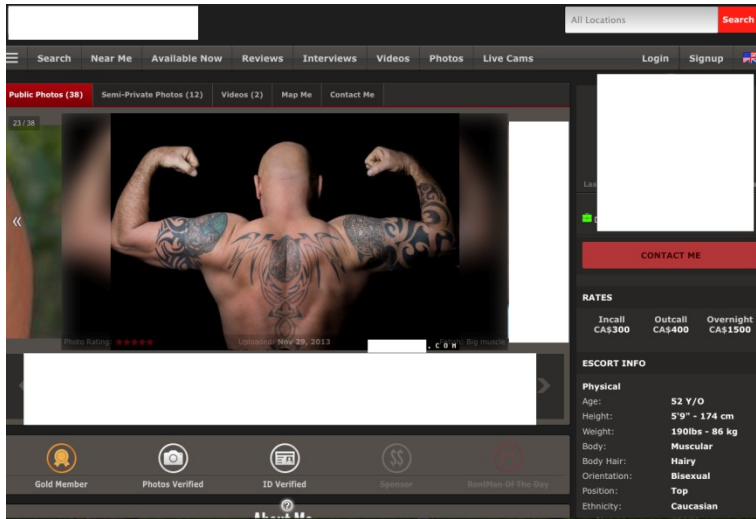

23 / 38

Photo Rating: ★★★★★

Updated: May 29, 2013

CONTACT ME

**RATES**

|         |         |           |
|---------|---------|-----------|
| Incall  | Outcall | Overnight |
| CA\$300 | CA\$400 | CA\$1500  |

**ESCORT INFO**

**Physical**

Age: 52 Y/O  
 Height: 5'9" - 174 cm  
 Weight: 190lbs - 86 kg  
 Body: Muscular  
 Body Hair: Hairy  
 Orientation: Bisexual  
 Position: Top  
 Ethnicity: Caucasian

Gold Member Photos Verified ID Verified Sponsor BestMan Of The Day
