# Supplementary material for: A Content Analysis of Health and Safety Communications Among Internet-Based Sex Work Advertisements: Important Information for Public Health
Source: PubMed Central journal article supplement (PMC5408134; doi:10.2196/jmir.6746), 2017-04-13
Supplement: jmir_v19i4e111_app2.pdf [file jmir_v19i4e111_app2.pdf]

Multi Media Appendix 2: Additional Advertising Details

| <b>Characteristic</b>                                                           | <b>Women<br/>(n=45)</b> | <b>Men<br/>(n=24)</b> | <b>Transgender<br/>persons<br/>(n=6)</b> | <b>Total n=75<br/>n (%)</b> |
|---------------------------------------------------------------------------------|-------------------------|-----------------------|------------------------------------------|-----------------------------|
| <b>Ads with Services Listed</b>                                                 | 35                      | 23                    | 6                                        | 64 (85)                     |
| <b>Types of Service<br/>Restrictions</b>                                        |                         |                       |                                          |                             |
| Uncovered services                                                              | 21                      | 9                     | 1                                        | 31 (41)                     |
| Greek/anal                                                                      | 9                       |                       |                                          | 9 (12)                      |
| Light-deep French kissing                                                       | 5                       |                       |                                          | 5 (7)                       |
| Other physical restrictions                                                     | 7                       | 1                     | 1                                        | 9 (12)                      |
| <b>Communicable Infection<br/>Communications</b>                                | 5                       | 8                     |                                          | 12 (16)                     |
| Do not have any STI                                                             | 5                       | 7                     |                                          | 12 (16)                     |
| Have an infection                                                               |                         | 1                     |                                          | 1 (1)                       |
| <b>“Rules” for Clients’ Health<br/>Behaviors</b>                                |                         |                       |                                          |                             |
| OK with using drugs during<br>encounter                                         | 2                       | 6                     |                                          | 8 (11)                      |
| Require client to shower at<br>the location prior to service                    | 5                       |                       |                                          | 5 (7)                       |
| <b>Safety and Security<br/>Restrictions for client<br/>behaviors identified</b> | 26                      | 9                     | 2                                        | 37(49)                      |
| Blocked numbers                                                                 | 5                       | 1                     | 1                                        | 7 (9)                       |
| Drinking/appearing drunk                                                        | 10                      |                       |                                          | 10 (13)                     |
| Taking pictures or videos<br>during the encounter                               | 2                       |                       |                                          | 2 (3)                       |
| Other                                                                           | 9                       | 8                     | 1                                        | 18 (24)                     |
| Unwilling to attend private<br>residence                                        | 3                       | 1                     | 1                                        |                             |
